# Supplementary material
Source: PubMed Central journal article supplement (PMC3382478)
Supplement: 1205945109_pnas.1205945109_SI.pdf [file 1205945109_pnas.1205945109_SI.pdf]

# Supporting Information

Zhang et al. 10.1073/pnas.1205945109

## SI Materials and Methods.

**Benchmarking the EM Energy.** In order to use 2D EM images to refine molecular structures, we need a score that measures the similarity between a 3D structure and 2D images. Our score is defined as the negative real-space cross-correlation between a target 2D EM image and the projection of a 3D structure along an estimated orientation angle. In our refinement protocol we refer to this score as the “EM energy.” The lower the EM energy, the more similar the model projection is to the 2D target image. During the model refinement, we lower the EM energy to improve the fit between the model projection and the target image by changing the 3D model and optimizing the projection orientation simultaneously; here we test the discrimination and robustness of the EM energy.

To test the reliability of the EM energy in identifying good models close to the target, 488 decoys are generated with  $C^\alpha$  rmsd in the range of 0.5–30 Å from the target native lysozyme crystal structure (Fig. S1A) using torsional-space normal modes (1) with the software package STAND. These decoys are projected along the  $z$  axis (with the  $z$  axis defined as pointing into the paper). We then generate simulated target EM images by projecting the native lysozyme structure along different orientations;  $\theta = 0^\circ$  or  $15^\circ$ , where  $\theta$  is the altitude angle to the  $z$  axis. Different levels of white noise  $\eta = 0\sigma$ ,  $1\sigma$ , or  $20\sigma$  ( $\sigma$  is the standard deviation of the pixel values in the image, normalized to 1) are added to target images to mimic experimental images with different signal-to-noise ratios. Modeling this experimental condition is done by normalizing the noise-free projection image using the “norm” option in the *proc2d* command in EMAN (2) to a pixel value average of zero and pixel value standard deviation of 1, and then adding different levels of noise using the “addnoise” option in *proc2d*. The “addnoise=level” option adds a flat-band noise with pixel values in a Gaussian distribution with level as the mean and level/2 as the standard deviation.

Next, the EM energies between the decoy projections and the target EM images are calculated (Fig. S1 B–F). Fig. S1B shows the case where the target EM image is generated by projecting the native model along the  $z$  axis without any noise added ( $\theta = 0^\circ$ ,  $\eta = 0\sigma$ ). In this ideal example, there is no difference in the projection angles between the target model and the decoys. The  $C^\alpha$  rmsd from the native structure tends to decrease as the EM energy decreases. Although more distant decoys with 8–20 Å  $C^\alpha$  rmsd may share a similar energy value (e.g.,  $-0.8$ ), the EM energy becomes more sensitive in distinguishing models with smaller  $C^\alpha$  rmsd values. The lowest EM energy also corresponds to the model with the smallest  $C^\alpha$  rmsd. The observed overall agreement between  $C^\alpha$  rmsd and EM energy indicates that our EM energy can be used to refine 3D structures against

2D EM images. The funnel-like shape of the plot shows that the EM energy becomes more discriminating as the decoys get closer to the target structure.

In Fig. S1F, the target image is projected with  $\theta = 15^\circ$ . In this case, we test the robustness of the EM energy in selecting good models in the presence of orientation inaccuracy, which is particularly necessary with real data. In addition to the orientation inaccuracy, a noise level of  $\eta = 1\sigma$  is added to the target image. This noise level is similar to the level in a typical cryoelectron microscopy (cryo-EM) 2D class average. After taking account of orientation inaccuracies and noise, we find that the funnel-like shape is preserved in the  $C^\alpha$  rmsd vs. EM energy plot. Due to orientation inaccuracies and noise, the EM energy never achieved an exact match (its value never reaches  $-1$ ). However, the lowest energy is still able to identify decoys with  $C^\alpha$  rmsd less than 5 Å from the target structure. This result suggests that it is possible to refine a 3D model against a 2D cryo-EM class average even with a  $15^\circ$  error in the initial estimate of the orientation parameters. In practice, we simultaneously refine the orientation parameters, explicitly minimizing orientation inaccuracy.

However, we do find that with an image noise level of  $\eta = 20\sigma$ , similar to the noise level in an unaveraged raw cryo-EM image (Fig. S1D), the  $C^\alpha$  rmsd vs. EM energy plot no longer holds a clear funnel-like pattern and cannot be used to refine structures due to the low signal-to-noise ratio.

**Generating a Series of Projection Orientations Around the Initial Orientation  $\Omega_{in}$ .** Each orientation is represented by the Euler angle (**Az**, **Alt**, **Phi**) following a ZZZ convention (a rotation of **Az** around the  $z$  axis, followed by a rotation of **Alt** around the  $x$  axis, and another rotation of **Phi** around the new  $z$  axis). For an initial orientation with **Az** =  $\alpha$ , **Alt** =  $\beta$ , **Phi** =  $\gamma$ , the series of projection orientations are generated as follows: (i) Set angle varying range to  $\epsilon$ ; (ii) set angle varying interval to  $\delta\epsilon$ ; (iii) pick **Az** values between  $[\alpha - \epsilon, \alpha + \epsilon]$  with interval of  $\delta\epsilon$ ; (iv) pick **Alt** values between  $[\beta - \epsilon, \beta + \epsilon]$  with interval of  $\delta\epsilon$ ; (v) pick **Phi** values between  $[\gamma - \epsilon, \gamma + \epsilon]$  with interval of  $\delta\epsilon$ ; (vi) use all combinations of the **Az**, **Alt**, and **Phi** as the new projection orientation Euler angles.

The initial  $\alpha$ ,  $\beta$ , and  $\gamma$  are estimated by maximizing the match between the model projection and the target image. The range  $\epsilon$  and the interval  $\delta\epsilon$  are set by the user to decide how much and how fine to vary the Euler angle to optimize the projection orientation. Although some of the orientations defined by these Euler angles may overlap, this angular sampling performs sufficiently well for the current application.

1. Levitt M, Sander C, Stern PS (1985) Protein normal-mode dynamics: Trypsin inhibitor, crambin, ribonuclease and lysozyme. *J Mol Biol* 181:423–447.

2. Ludtke SJ, Baldwin PR, Chiu W (1999) EMAN: Semiautomated software for high-resolution single-particle reconstructions. *J Struct Biol* 128:82–97.

















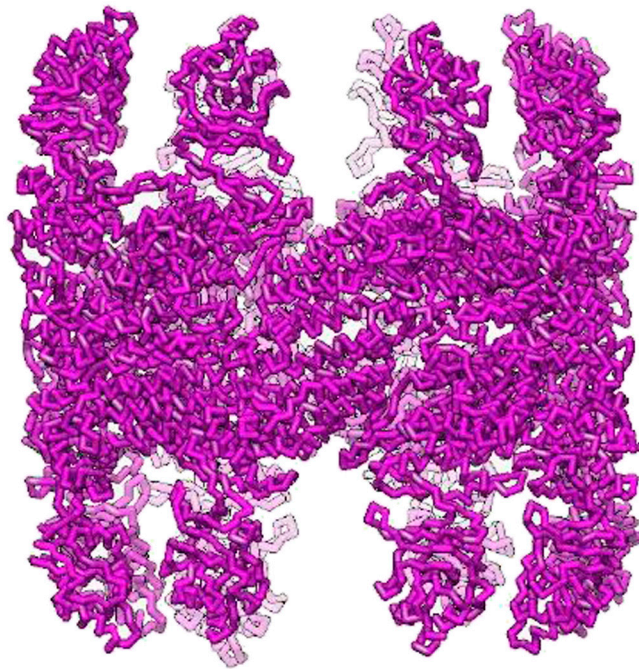

**Movie S2.** First 10,000 steps of the temperature modulated NM-MC refinement of Mm-cpn at level 2 from the refined model of level 1. Models are shown for every 100 steps.

[Movie S2 \(MOV\)](#)

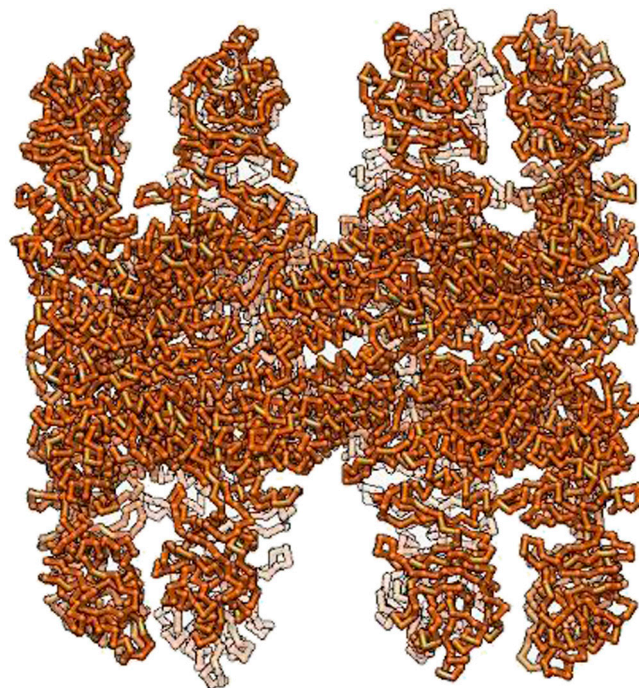

**Movie S3.** First 10,000 steps of the temperature modulated NM-MC refinement of Mm-cpn at level 3 from the refined model of level 2. Models are shown for every 100 steps.

[Movie S3 \(MOV\)](#)
